# Supplementary material for: Arabidopsis phospholipase Dα1 and Dδ oppositely modulate EDS1- and SA-independent basal resistance against adapted powdery mildew
Source: PubMed Central journal article supplement (PMC6022666; doi:10.1093/jxb/ery146), 2018-04-18
Supplement: ery146_suppl_supplementary_figures_tables.pdf [file ery146_suppl_supplementary_figures_tables.pdf]

## Supplementary Figure S1

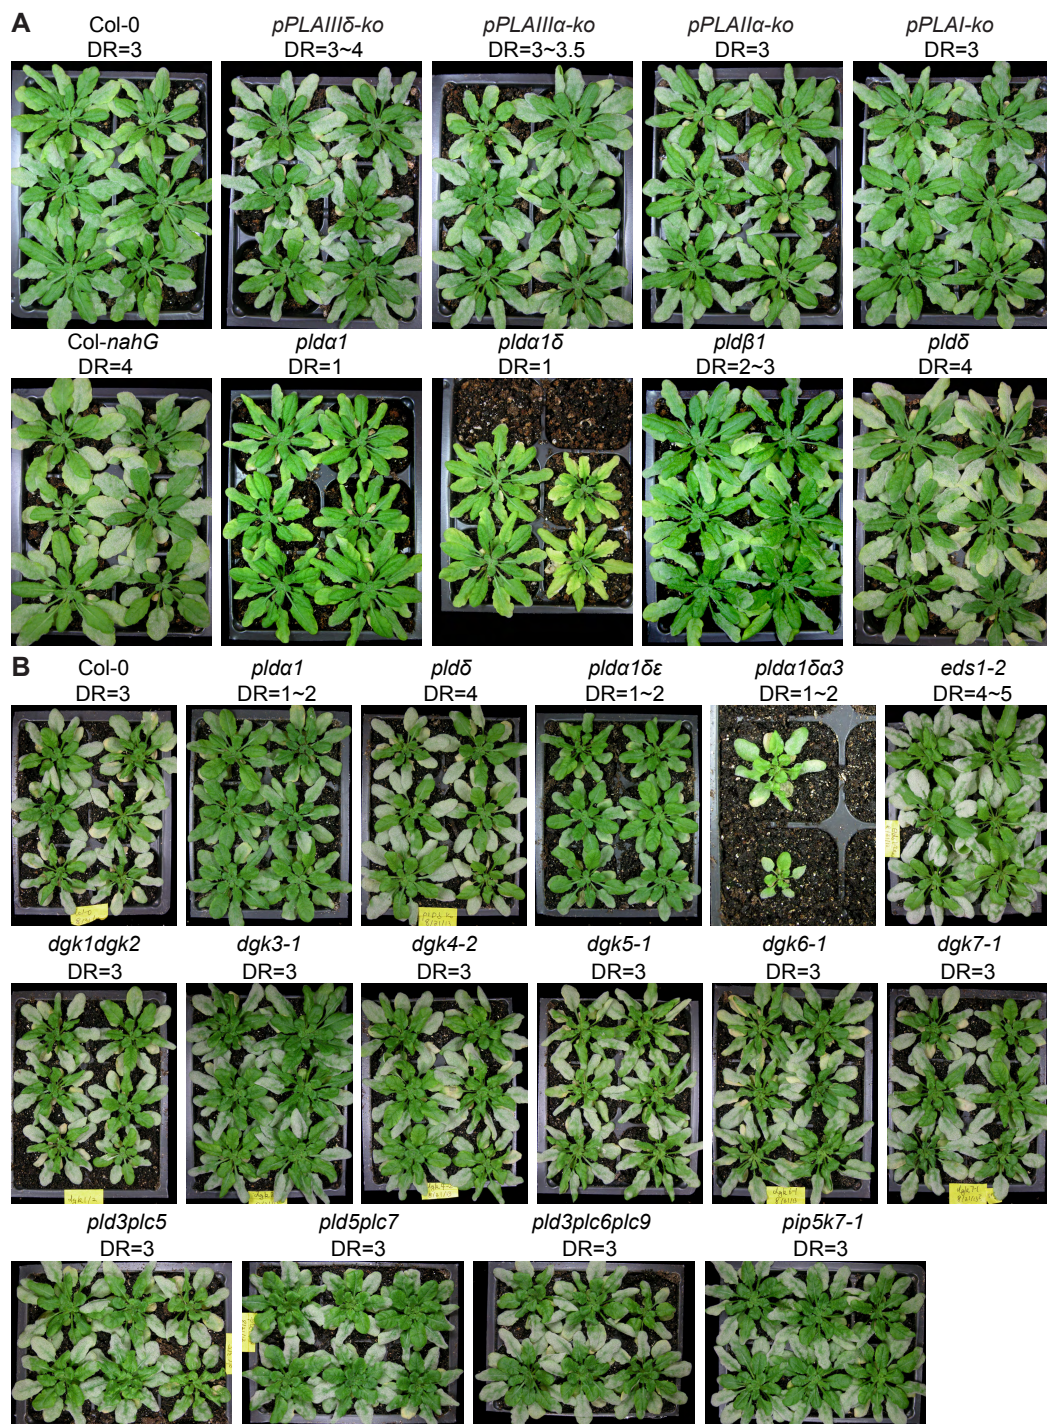

**Supplementary Figure S1. Disease reaction phenotypes of *pPLA*, *PLD*, *PLC*, *DGK* and *PIP5K* T-DNA insertion mutants infected with *Gc UCSC1*.**

(A, B) Representative plants of indicated genotypes infected with *Gc UCSC1* at 8 dpi (A) or 11 dpi (B). Note that *pld $\beta$ 1* showed slight “edr” to *Gc UCSC1*, and *plda1 $\delta\alpha$ 3* and *plda1 $\delta\epsilon$*  triple mutants displayed similar level of “edr” as *plda1*. The disease reaction (DR) scores (0, resistant; 1 to 2, intermediate; 2 to 3 or 3 or 3 to 4, susceptible; 4 to 5, “eds”; Xiao et al., 2005) are shown above the photos.

## Supplementary Figure S2

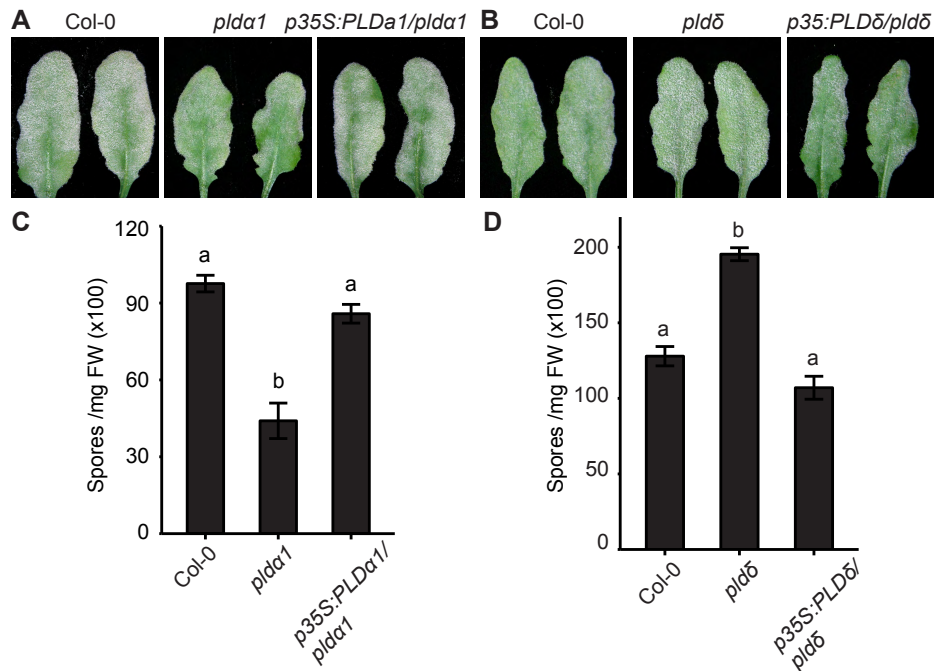

### Supplementary Figure S2. Genetic complementation of the *plda1* and *pldδ* mutant genes by their respective wild-type genes.

(A, B) Representative images of leaves of indicated genotypes infected with *Gc* UCSC1 at 13 and 10 dpi, respectively.

(C, D) Quantification of spore production in leaves of indicated genotypes from (A, B) normalized to leaf fresh weight (FW). Data represent mean  $\pm$  SEM of four samples in (A) and three samples in (B) (4 leaves each sample), from one experiment, which was repeated twice with similar results. Different lowercase letters indicate statistically different groups as determined by multiple comparisons using one-way ANOVA, followed by Tukey-HSD ( $P < 0.01$ ).



## Supplementary Figure S3

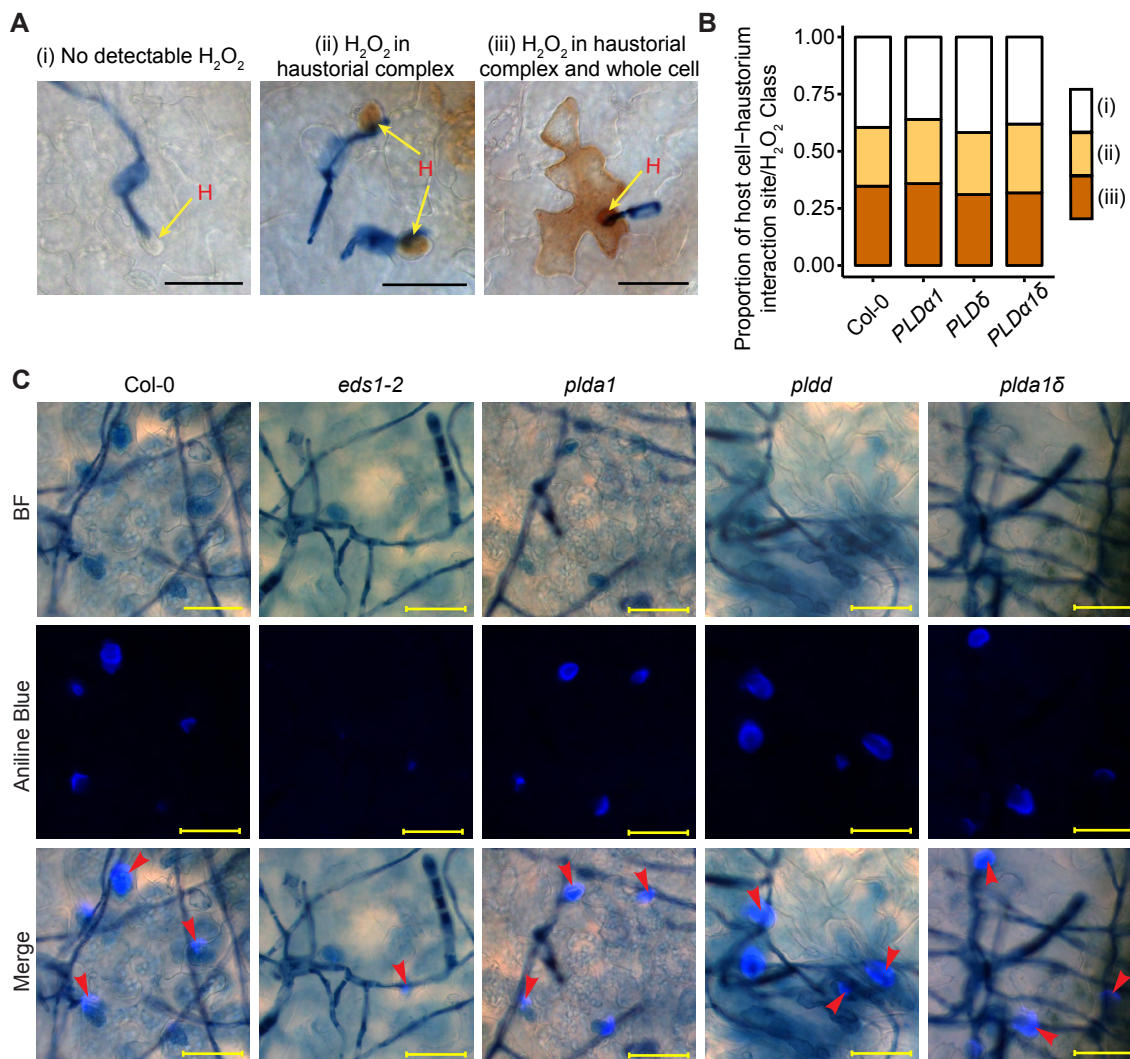

### Supplementary Figure S3. Loss of *PLDa1* or *PLD $\delta$* or both do not impact $H_2O_2$ production and callose deposition in the haustorium-invaded epidermal cells.

**(A)** Representative images of three types of  $H_2O_2$  production in haustorium-epidermal cell interaction site: (i)  $H_2O_2$  is not detectable; (ii)  $H_2O_2$  accumulates in the haustorial complex; and (iii)  $H_2O_2$  is found in both haustorial complex and the whole cell. Leaf samples were inoculated with *Gc* UMSG1 and stained by 3,3'-diaminobenzidine (DAB) at 3dpi.

**(B)** Frequencies of the three types of  $H_2O_2$  production shown in **(A)** in each of the indicated genotypes. Total of between 750 to 1300 interaction sites combined from three independent experiments were evaluated for each genotype.

**(C)** Representative images showing callose formation in the indicated genotypes. Leaf samples were inoculated with *Gc* UCSC1 and stained blue by aniline blue at 3dpi. Arrowheads indicate three types of callose deposition: encasement of the haustorium, half encasement of the haustorium, and callose is restricted to the penetration site. Bars, 50  $\mu$ M. BF, bright field.

## Supplementary Figure S4

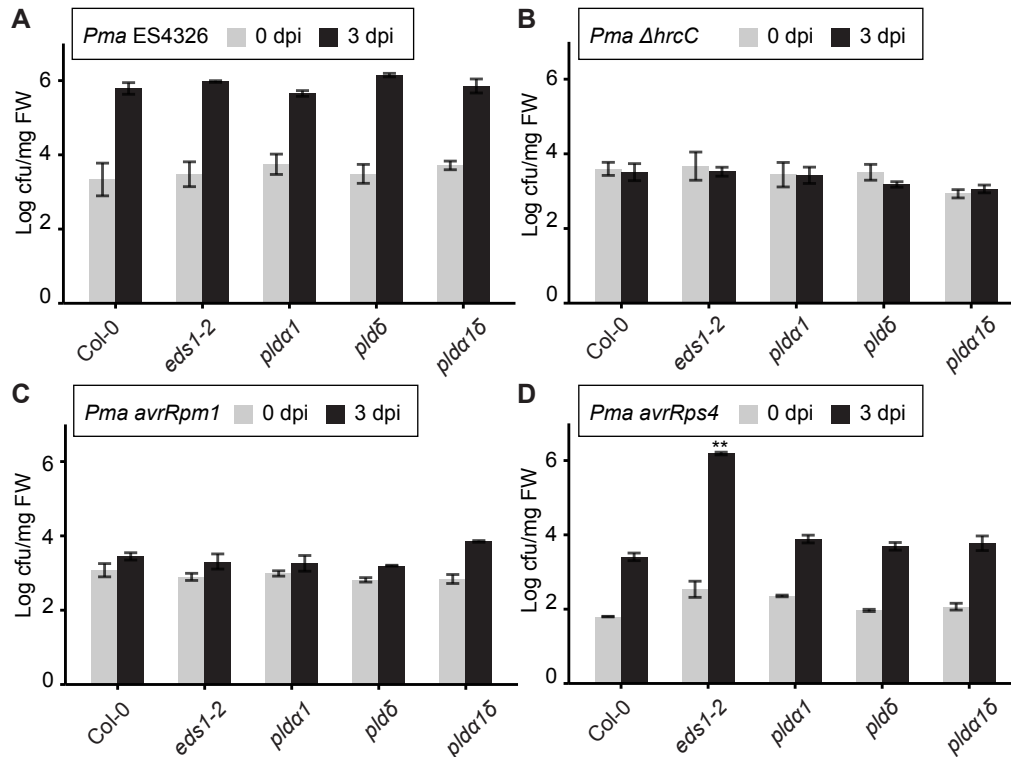

### Supplementary Figure S4. Loss of *PLD* $\alpha$ 1 and/or *PLD* $\delta$ does not affect ETI against bacterial pathogens.

Fifteen-day-old seedlings were dip-inoculated with *Pma* ES4326 (A), *Pma*  $\Delta$ hrcC (B), *Pma* avrRpm1 (C) and *Pma* avrRps4 (D). Seedling samples were collected at 0 dpi (1 hour post inoculation) and 3 dpi and bacterial growth was quantified. Data represent mean  $\pm$  SEM (n = 4). One-way ANOVA followed by Tukey-HSD was conducted to evaluate whether there was any significant difference in bacterial growth between Col-0 and the indicated genotypes (\*\*p < 0.01, p > 0.05 for the remaining). FW, fresh weight.

## Supplementary Figure S5

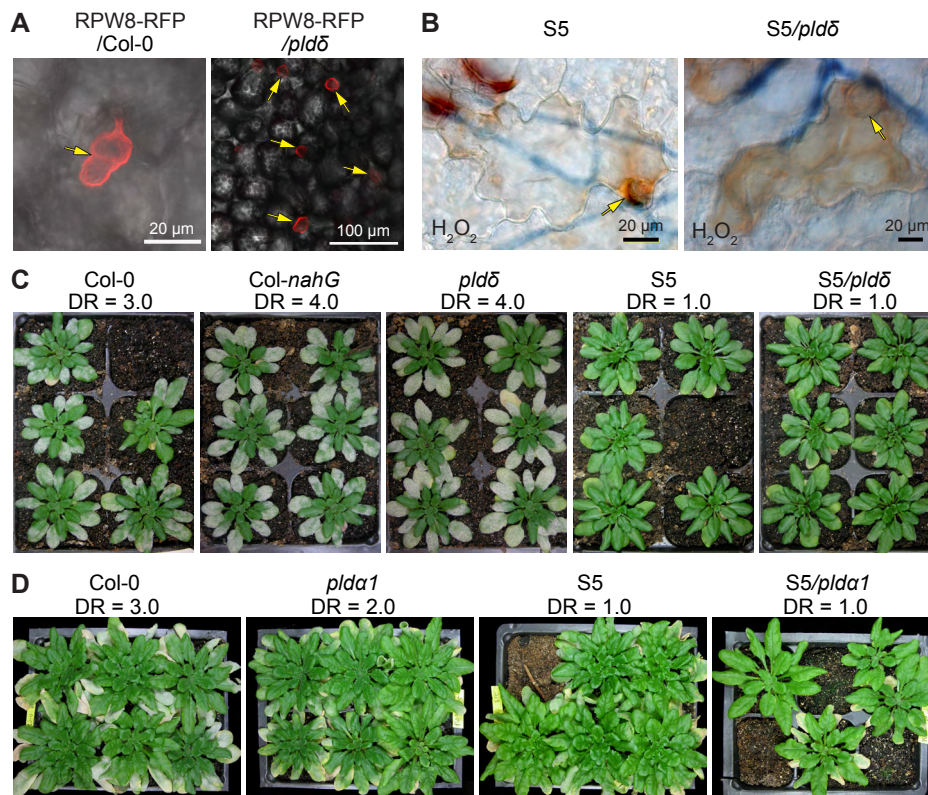

### Supplementary Figure S5. *PLDα1* and *PLDδ* are not required for RPW8-mediated resistance to *Gc UCSC1*.

**(A)** Subcellular localization of RPW8-RFP in Col-0 and *pldδ* in *Gc UCSC1* haustorium-invaded cells. The confocal images shown are Z-stack projections of 15 optical sections taken at 2 dpi. Note that RPW8-RFP localization in *pldδ* mutant was not affected.

**(B)** RPW8-triggered H<sub>2</sub>O<sub>2</sub> accumulation in haustorium-invaded epidermal cells of S5 (Col-0 expressing RPW8) and S5/*pldδ* was visualized by 3,3'-diaminobenzidine (DAB) staining at 3 dpi with *Gc UCSC1*. Haustoria are indicated by arrows. Bars, 20µm.

**(C, D)** Representative plants of indicated genotypes infected with *Gc UCSC1* at 13 dpi **(C)** and 14 dpi **(D)**. The disease reaction (DR) scores (0, resistant; 1 to 2, intermediate; 2 to 3 or 3 to 3 or 3 to 4, susceptible; 4 to 5, "eds" ; Xiao et al., 2005) are shown above the images.

## Supplementary Figure S6

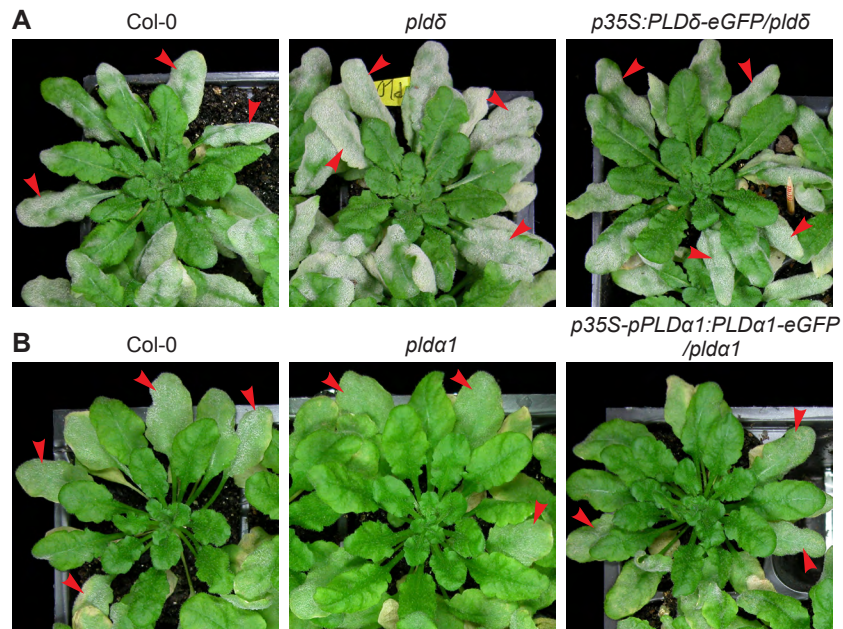

**Supplementary Figure S6. The PLD $\delta$ -eGFP and PLD $\alpha$ 1-eGFP fusion proteins are functional.**

Representative plants of the indicated genotypes infected with *Gc* UCSC1 at 12dpi. While the transgene *35S:PLD $\delta$ -eGFP* could fully rescue the "eds" phenotype of *pld $\delta$*  (A), *p35S-pPLD $\alpha$ 1:PLD $\alpha$ 1-eGFP* could partially restore the "edr" phenotype of *pld $\alpha$ 1* (B). Leaves marked with red arrowheads display typical disease phenotypes of indicated genotypes.



## Supplementary Figure S7

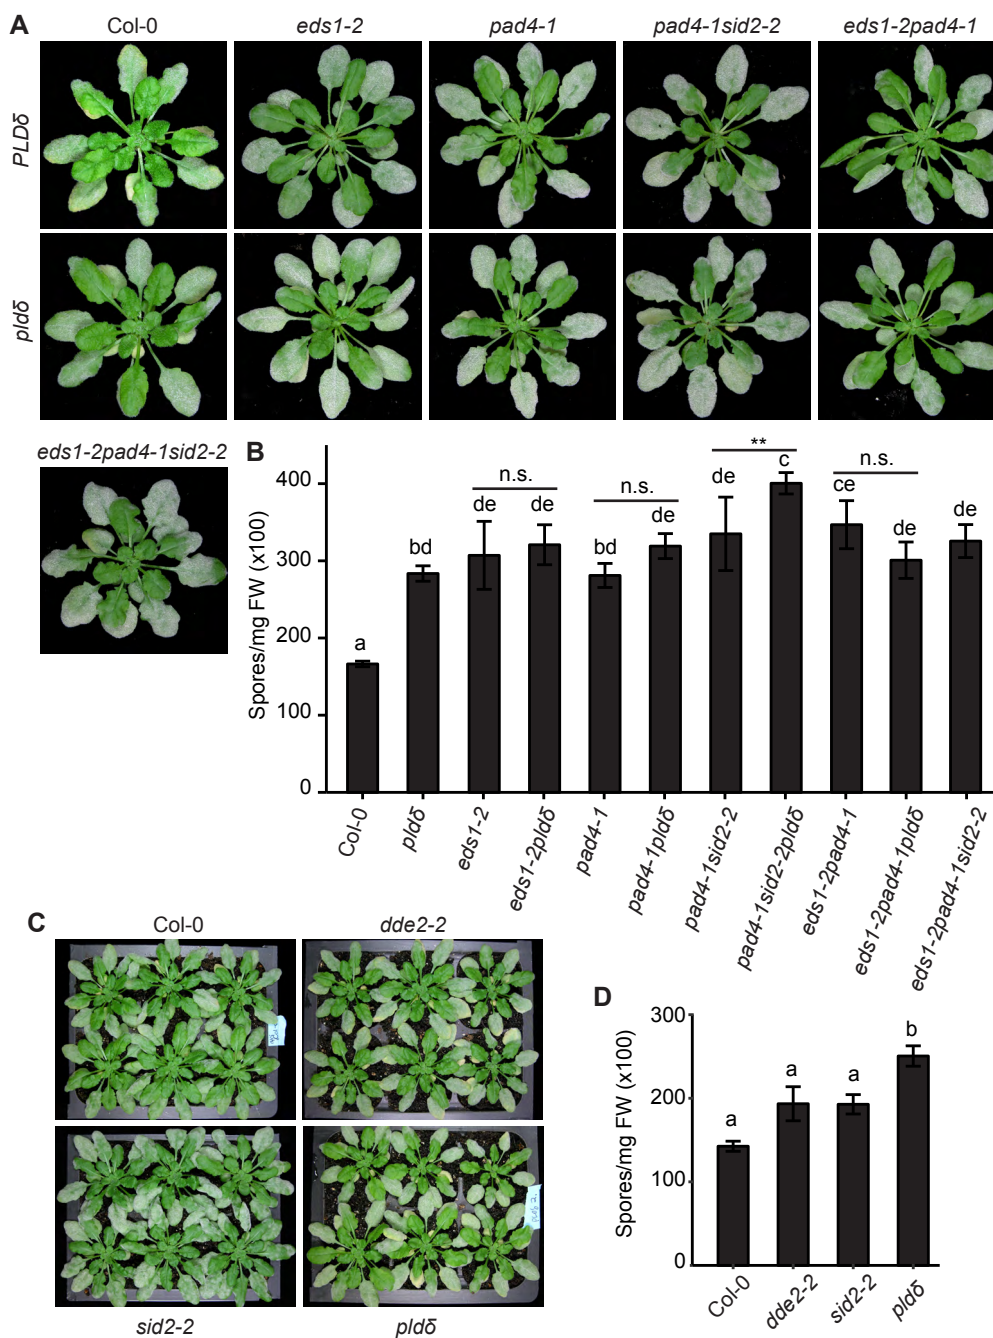

### Supplementary Figure S7. *Gc* UCSC1 infection phenotypes of *pldδ*-containing double and triple mutants and relevant controls.

(A) Representative leaves of indicated genotypes (defined by name IDs from both X and Y axes) infected with *Gc* UCSC1 at 10 dpi.

(B) Quantification of spore production in indicated genotypes at 10 dpi normalized to leaf fresh weight (FW).

(C) Plants of indicated genotypes infected with *Gc* UCSC1 at 10dpi.

(D) Quantification of spore production of plants in (C). Bars represent mean  $\pm$  SEM of four samples (n=4, 4 leaves each) from one experiment, which was repeated three times with similar results. Different lowercase letters indicate statistically different groups as determined by multiple comparisons using one-way ANOVA, followed by Tukey-HSD (\*\*P < 0.01). Note that no significant (n.s.) difference (P>0.05) was found in three of the four indicated pair of genotypes in (B).

## Supplementary Figure S8

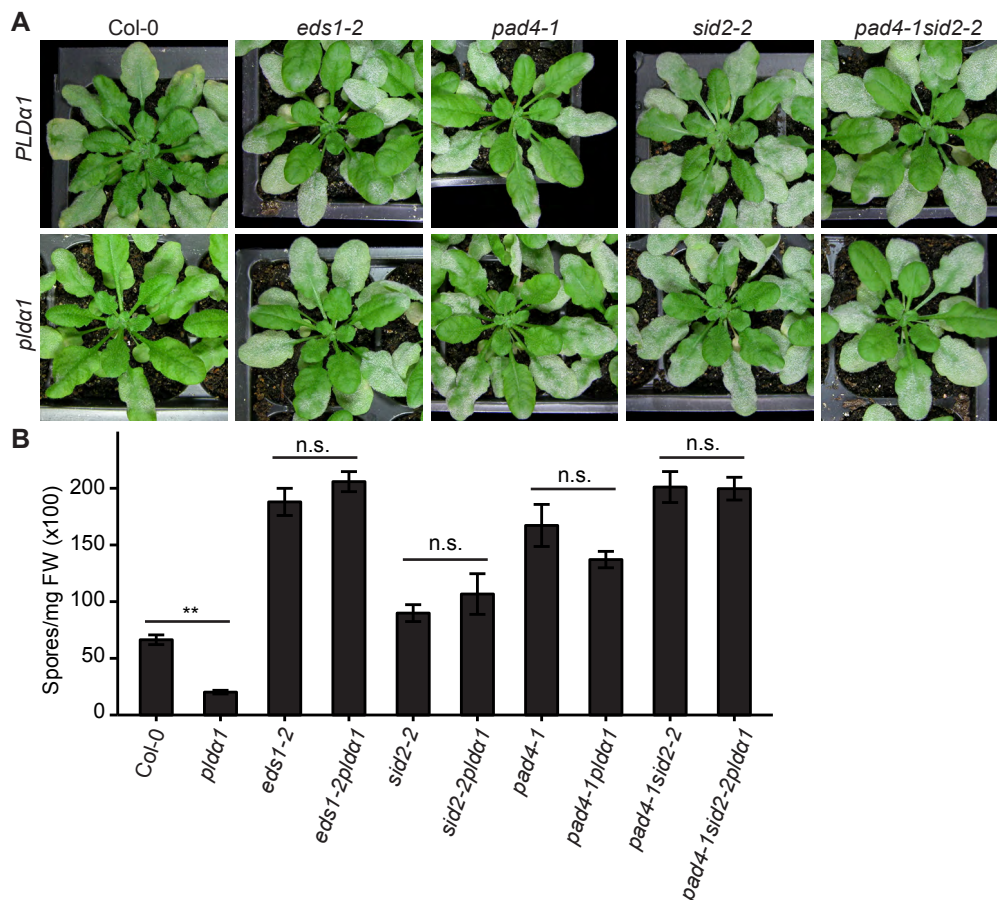

**Supplementary Figure S8. The “edr” phenotype of *plda1* to *Gc* UCSC1 is suppressed by the *eds1-2*, *sid2-2* and/or *pad4-1* mutations.**

**(A)** Representative leaves of indicated genotypes (defined by name IDs from both X and Y axes) infected with *Gc* UCSC1 at 10 dpi.

**(B)** Quantification of spore production in indicated genotypes at 10 dpi normalized to leaf fresh weight (FW). Data represent mean  $\pm$  SEM of four samples ( $n=4$ , 4 leaves each) from one experiment, which was repeated three times with similar results. No significant (n.s.) difference ( $P>0.05$ , Student *t*-test) was detected in all the pairs indicated, except for the Col-0, *plda1* pair (\*\* $p<0.01$ ).



## Supplementary Figure S9

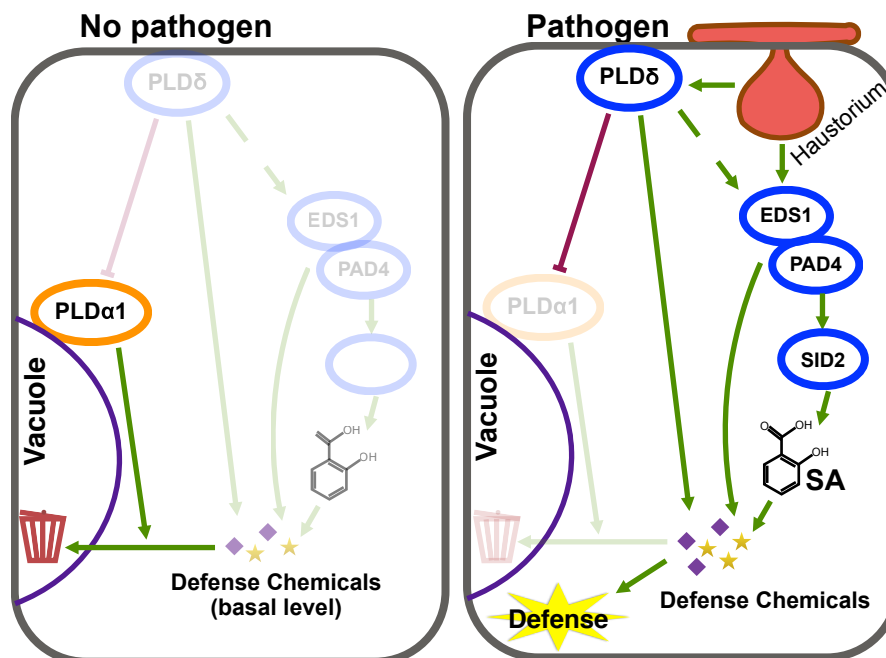

### Supplementary Figure S9. A working model for the roles of PLD $\alpha$ 1 and PLD $\delta$ in plant immunity.

In this model, PLD $\delta$  positively whereas PLD $\alpha$ 1 negatively modulates plant basal resistance against powdery mildew with PLD $\alpha$ 1 acting downstream of PLD $\delta$ . We hypothesize that upon perception of pathogen invasion, plasma membrane-associated PLD $\delta$  is activated and functions through a novel, SA-independent, signaling pathway(s), which is also distinct from, but possibly overlapping with, the EDS1/PAD4-dependent pathway(s) (indicated by a dashed line). By contrast, intracellular PLD $\alpha$ 1 is involved in removal of defense chemicals produced from basal activities of PLD $\delta$ - and EDS1/PAD4-dependent pathways, thereby preventing inappropriate activation of defenses in the absence of pathogens. However, in the presence of powdery mildew or oomycete pathogens, PLD $\delta$  is activated, repressing PLD $\alpha$ 1 activity, which leads to accumulation of defense chemicals, resulting in activation of defense responses. This model also implies that PA pools produced in different subcellular compartments have distinct roles in regulation of plant defense responses.

Table S1: Arabidopsis T-DNA insertion mutants screened in this study

| Mutant name                   | Gene Locus                    | T-DNA line                              |
|-------------------------------|-------------------------------|-----------------------------------------|
| <i>pldαI</i> [1]              | At3g15730                     | SALK_053785                             |
| <i>pldβI</i> [2]              | At2g42010                     | SALK_079133                             |
| <i>pldδ</i> [3]               | At4g35790                     | SALK_023247                             |
| <i>pldαIδ</i>                 | At3g15730/At4g35790           | see above                               |
| <i>pPLAIIIδ-knockout (ko)</i> | At3g63200                     | SALK_029470                             |
| <i>pPLAIIIγ-ko</i>            | At4g29800                     | SALK_088404                             |
| <i>pPLAIIIβ-ko</i> [4]        | At3g54950                     | SALK_057212                             |
| <i>pPLAIIIα-ko</i>            | At2g39220                     | SALK_040363                             |
| <i>pPLAIIδ-ko</i>             | At4g37060                     | SALK_090933                             |
| <i>pPLAIIβ-ko</i>             | At4g37050                     | SALK_142351                             |
| <i>pPLAIIα</i>                | At2g26560                     | SALK_059119                             |
| <i>pPLAI-ko</i>               | At1g61850                     | SALK_087152                             |
| <i>pip5k7-1</i>               | At1g10900                     | SALK_151429c                            |
| <i>plc3/5</i>                 | At4g38530/At5g58690           | SALK_037453/SALK_144469                 |
| <i>plc5/7</i>                 | At5g58690/At3g55940           | SALK_144469/SALK_030333                 |
| <i>plc3/6/9</i>               | At4g38530/At2g40116/At3g47220 | SALK_037453/SALK_090508/SALK_025949     |
| <i>dgk1/2</i>                 | At5g07920/At5g63770           | SALK_053412/SAIL_718_G03                |
| <i>dgk3-1</i>                 | At2g18730                     | SALK_028600                             |
| <i>dgk4-2</i>                 | At5g57690                     | SALK_069158                             |
| <i>dgk5-1</i>                 | At2g20900                     | SAIL_1212_E10                           |
| <i>dgk6-1</i>                 | At4g28130                     | SALK_016285                             |
| <i>dgk7-1</i>                 | At4g30340                     | SALK_51_E04                             |
| <i>pldαIδα3</i>               | At3g15730/At4g35790/At5g25370 | SALK_067533 / SALK_023247 / SALK_122059 |
| <i>pldαIδε</i>                | At3g15730/At4g35790/At1g55180 | SALK_067533 / SALK_023247 /KONCZ68434   |

## References

- [1] Wenhua Zhang et al. “Phospholipase D $\alpha$ 1-derived phosphatidic acid interacts with ABI1 phosphatase 2C and regulates abscisic acid signaling”. In: *Proceedings of the National Academy of Sciences of the United States of America* 101.25 (2004), pp. 9508–9513.
- [2] Jian Zhao et al. “*Arabidopsis* phospholipase D $\beta$ 1 modulates defense responses to bacterial and fungal pathogens”. In: *New Phytologist* (2013).
- [3] Francesco Pinosa et al. “*Arabidopsis* Phospholipase D $\delta$  Is Involved in Basal Defense and Nonhost Resistance to Powdery Mildew Fungi”. In: *Plant physiology* 163.2 (2013), pp. 896–906.
- [4] Maoyin Li et al. “Patatin-related phospholipase pPLAIII $\beta$ -induced changes in lipid metabolism alter cellulose content and cell elongation in *Arabidopsis*”. In: *The Plant Cell* 23.3 (2011), pp. 1107–1123.



Table S2: Primers used in this study

| Primer ID          | Sequence (5' → 3')                | Purpose                        |                                                                                   |
|--------------------|-----------------------------------|--------------------------------|-----------------------------------------------------------------------------------|
|                    |                                   | Adapter                        | Cloning                                                                           |
| PLD $\alpha$ 1-pF  | caccGGATCCGGCTTCGCTTTTGGGTTTTCT   | cacc & BamHI                   | PLD $\alpha$ 1 genomic sequence and promoter                                      |
| PLD $\alpha$ 1-F   | caccATGGCGCAGCATCTGTTGCA          | cacc                           | PLD $\alpha$ 1 genomic sequence                                                   |
| PLD $\alpha$ 1-R1  | TTAGGTTGTAAGGATTGGAGGCA           | no                             | PLD $\alpha$ 1 genomic sequence without stop codon for C-terminal fusion with YFP |
| PLD $\alpha$ 1-R2  | GGTTGTAAGGATTGGAGGCAGGTA          | no                             | PLD $\alpha$ 1 genomic sequence with stop codon                                   |
| PLD $\delta$ -F    | caccGGATCCATGGCGGAGAAAGTATCGGA    | cacc & BamHI                   | PLD $\delta$ genomic sequence                                                     |
| PLD $\delta$ -R    | GCGAATTCTTACGTGGTTAAAGTGTCAGGAAGA | EcoRI                          | PLD $\delta$ genomic sequence with stop codon                                     |
| PLD $\delta$ -R2   | CGTGGTTAAAGTGTCAGGAAGAGCCA        | no                             | PLD $\delta$ genomic sequence without stop codon for C-terminal fusion with YFP   |
| H-PLD $\delta$ -pF | caccAAGCTTGTCTCAGCCCATACAGCTCA    | cacc & HindIII                 | PLD $\delta$ promoter                                                             |
| S-PLD $\delta$ -pR | GTACTAGTGGTTACAACAATTCAGGTGGAA    | SpeI                           | PLD $\delta$ promoter                                                             |
|                    |                                   | Gene locus                     | Genotyping                                                                        |
| PLD $\alpha$ 1-RP  | CAAGGCTGCAAAGTTTCTCTG             | <i>PLD<math>\alpha</math>1</i> | PLD $\alpha$ 1-RP/LP pair detects the WT allele,                                  |
| PLD $\alpha$ 1-LP  | ATTAAGTGCAAGGCATTGATG             | At3g15730                      | RP/LBa1 detects T-DNA.                                                            |
| PLD $\delta$ -RP   | TCCGTTTGACCAGATCCATAG             | <i>PLD<math>\delta</math></i>  | PLD $\delta$ -RP/LP pair detects the WT allele,                                   |
| PLD $\delta$ -LP   | TTGCGATTATTACCAACAGCC             | At4g35790                      | RP/LBa1 detects T-DNA.                                                            |
| LBa1               | GCCATCGCCCTGATAGACGGTT            | -                              | Genotyping of Salk T-DNA lines.                                                   |
| EDS6               | GTGGAAACCAAATTTGACATTAG           | <i>EDS1</i>                    | Genotyping of <i>eds1-2</i> .                                                     |
| EDS4               | GGCTTGTAATTCATCTTCTATCC           | At3g48090                      | WT allele: 1500 bp + 750 bp                                                       |
| 105/E2             | ACACAAGGGTGATGCGAGACA             |                                | Mut allele: 1500 bp + 600 bp                                                      |
| pad4-1F            | GCGATGCATCAGAAGAGCA               | <i>PAD4</i>                    | Amplicons are subject to <i>Bsm</i> FI digestion.                                 |
| pad4-1R            | GCGTTGTGCTCGCGTATCT               | At3g52430                      | WT allele: 260 bp + 108 bp after digestion.                                       |
| sid2-2.F5          | TTCTTCATGCAGGGGAGGAG              | <i>SID2</i>                    | F5/R5 pair amplifies 7328 bp from the WT allele,                                  |
| sid2-2.F6          | CAACCACCTGGTGCACCAGC              | At1g74710                      | but 581 bp from the <i>sid2-2</i> mutant allele.                                  |
| sid2-2.R5          | AAGCAAAATGTTGAGTCAGCA             |                                | F6/R5 pair amplifies 879 bp from the WT allele.                                   |
| RPW8.1-F           | ATGCCGATTGGTGAGCTTGCGATA          | RPW8.1                         | <i>RPW8.1</i> transgene                                                           |
| RPW8.1-R           | TCAAGCTCTTATTTACTACAAGC           |                                |                                                                                   |
| RPW8.2-F           | ATGATTGCTGAGGTTGCCGCA             | RPW8.2                         | <i>RPW8.2</i> transgene                                                           |
| RPW8.2-R           | TCAAGAATCATCACTGCAGAACGT          |                                |                                                                                   |
|                    |                                   | Gene locus                     | qRT-PCR                                                                           |
| AtPR1-F            | AGAGGCAACTGCAGACTCATAAC           | At2g14610                      | AtPR1-F/R detects <i>PR1</i> gene transcripts                                     |
| AtPR1-R            | AGCCTTCTCGCTAACCCACAT             |                                |                                                                                   |
| AtPDF1.2-F         | TGTTCTCTTTGCTGCTTTCGACGC          | At5g44420                      | AtPDF1.2-F/R detects <i>PDF1.2</i> gene transcripts                               |
| AtPDF1.2-R         | TGTGTGCTGGGAAGACATAGTTGC          |                                |                                                                                   |
| AtUBC9-F           | CAGTGGAGTCTGCTCTCACAA             | At4g27960                      | AtUBC9-F/R detects <i>UBC9</i> gene transcripts                                   |
| AtUBC9-R           | CATCTGGGTTTGATCCGTTA              |                                |                                                                                   |
